# Supplementary material for: Evolutionary accumulation of FKS1 mutations from clinical echinocandin-resistant Candida auris
Source: PubMed Central journal article supplement — Emerg Microbes Infect. 2024 Jul 11;13(1):2377584. doi: 10.1080/22221751.2024.2377584 (PMC11265302; doi:10.1080/22221751.2024.2377584), 2024-07-11
Supplement: TEMI_A_2377584_SM4779.pdf [file TEMI_A_2377584_SM4779.pdf]

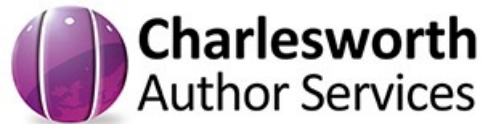

# EDITORIAL CERTIFICATE

This document certifies that the manuscript below was edited for correct English language usage, grammar, punctuation and spelling by qualified native English speaking editors at Charlesworth Author Services.

## **Paper Title:**

Evolutionary accumulation of FKS1 mutations from clinical echinocandin-resistant *Candida auris*

## **Author:**

sufei tian

## **Date certificate issued:**

June 07, 2024

[cauthors.com](http://cauthors.com)
